# Supplementary material for: Synergy of the Bacteriocin AS-48 and Antibiotics against Uropathogenic Enterococci
Source: PubMed Central journal article supplement (PMC7558097; doi:10.3390/antibiotics9090567), 2020-09-02
Supplement: antibiotics-09-00567-s001.pdf [file antibiotics-09-00567-s001.pdf]

## Supplementary Materials

**Table S1.** Genotypic characterization of the isolated clinical strains. Ef, *Enterococcus faecium*, EF, *E. faecalis*. *gel*, gelatinase; *hyl*, hyaluronidase; *asa1*, aggregation substance; *cylA*, cytolysin A; *esp*, extracellular surface protein; *ace*, accessory colonization factor; *efaA*, adhesin; *vanA/B*, vancomycin resistance genes.

| Genotypic characterization  |            |                          |             |            |             |            |             |            |             |             |             |
|-----------------------------|------------|--------------------------|-------------|------------|-------------|------------|-------------|------------|-------------|-------------|-------------|
| <i>Enterococcus</i> strains | RAPD group | <i>Enterococcus</i> spp. | <i>gelE</i> | <i>hyl</i> | <i>asa1</i> | <i>esp</i> | <i>cylA</i> | <i>ace</i> | <i>efaA</i> | <i>vanA</i> | <i>vanB</i> |
| Sb7                         | G1         | Ef                       | -           | -          | +           | +          | -           | -          | -           | -           | -           |
| 47391                       | G1         | Ef                       | -           | -          | +           | +          | -           | -          | -           | -           | -           |
| 491802                      | G2         | Ef                       | -           | +          | -           | -          | -           | -          | -           | -           | -           |
| 49767                       | G3         | EF                       | +           | -          | -           | +          | -           | -          | +           | -           | -           |
| 49867                       | G3         | EF                       | +           | -          | -           | +          | -           | +          | +           | -           | -           |
| 49890                       | G3         | EF                       | +           | -          | +           | -          | -           | +          | +           | -           | -           |
| 491047                      | G3         | EF                       | +           | -          | -           | -          | -           | -          | +           | -           | -           |
| 491698                      | G3         | EF                       | +           | -          | -           | -          | -           | -          | +           | -           | -           |
| U-666                       | G4         | EF                       | +           | -          | +           | +          | -           | -          | +           | -           | -           |
| U-603                       | G4         | EF                       | +           | -          | +           | +          | -           | -          | +           | -           | -           |
| U-1688                      | G4         | EF                       | +           | -          | +           | +          | -           | -          | +           | -           | -           |
| U-230                       | G4         | EF                       | +           | -          | +           | +          | -           | -          | +           | -           | -           |
| 481467                      | G4         | EF                       | +           | -          | +           | +          | -           | -          | +           | -           | -           |
| U-134                       | G4         | EF                       | +           | -          | +           | -          | -           | -          | +           | -           | -           |
| U-1593                      | G4         | EF                       | +           | -          | +           | -          | -           | -          | +           | -           | -           |
| 491051                      | G4         | EF                       | +           | -          | +           | -          | -           | -          | +           | -           | -           |
| 491044                      | G4         | EF                       | +           | -          | +           | -          | -           | -          | +           | -           | -           |
| U-1739                      | G4         | EF                       | +           | -          | +           | -          | -           | -          | +           | -           | -           |
| U-1683                      | G4         | EF                       | +           | -          | +           | -          | -           | -          | +           | -           | -           |
| U-1261                      | G4         | EF                       | +           | -          | -           | -          | -           | -          | +           | -           | -           |
| U-834                       | G4         | EF                       | +           | -          | -           | -          | -           | -          | +           | -           | -           |
| U-1641                      | G4         | EF                       | +           | -          | -           | -          | -           | -          | +           | -           | -           |
| U-1822                      | G4         | EF                       | +           | -          | -           | +          | -           | -          | +           | -           | -           |
| U-1839                      | G4         | EF                       | -           | -          | +           | +          | -           | -          | +           | -           | -           |
| U-814                       | G4         | EF                       | -           | -          | +           | +          | -           | -          | -           | -           | -           |
| U-1564                      | G4         | EF                       | -           | -          | +           | -          | -           | -          | -           | -           | -           |
| 481396                      | G4         | EF                       | -           | -          | +           | -          | +           | +          | +           | -           | -           |
| 4953                        | G4         | EF                       | +           | -          | +           | -          | +           | +          |             | -           | -           |
| 49768                       | G4         | EF                       | +           | -          | -           | -          | -           | +          | +           | -           | -           |

|           |     |              |       |       |       |       |       |       |       |     |     |
|-----------|-----|--------------|-------|-------|-------|-------|-------|-------|-------|-----|-----|
| 491284    | G4  | EF           | +     | -     | +     | +     | -     | +     | +     | -   | -   |
| 49891     | G4  | EF           | +     | -     | -     | -     | -     | +     | -     | -   | -   |
| 47374     | G4  | EF           | +     | -     | +     | +     | +     | +     | +     | -   | -   |
| 481398    | G5  | EF           | +     | -     | +     | -     | -     | +     | +     | -   | -   |
| U-800     | G5  | EF           | +     | -     | -     | -     | -     | -     | +     | -   | -   |
| 481609    | G5  | EF           | +     | -     | -     | -     | -     | -     | +     | -   | -   |
| 481413    | G5  | EF           | +     | -     | +     | -     | -     | +     | +     | -   | -   |
| 49850     | G5  | EF           | +     | -     | -     | -     | -     | +     | +     | -   | -   |
| 49454     | G6  | EF           | -     | -     | +     | +     | +     | +     | +     | -   | -   |
| U-1846    | G6  | EF           | +     | -     | +     | -     | -     | -     | +     | -   | -   |
| U-1679    | G7  | EF           | -     | -     | -     | -     | -     | -     | +     | -   | -   |
| 49353     | G7  | EF           | +     | +     | -     | -     | -     | -     | +     | -   | -   |
| 491440    | G7  | EF           | +     | -     | +     | -     | +     | +     | +     | -   | -   |
| 491797    | G7  | EF           | +     | -     | +     | -     | -     | -     | +     | -   | -   |
| 491376    | G8  | EF           | +     | -     | +     | -     | -     | +     | +     | -   | -   |
| 49324     | G8  | EF           | +     | -     | +     | -     | -     | +     | +     | -   | -   |
| U-1765    | G9  | EF           | -     | -     | -     | +     | -     | -     | +     | -   | -   |
| 47342     | G9  | EF           | -     | -     | +     | -     | -     | +     | +     | -   | -   |
| 491336    | G9  | EF           | +     | -     | +     | -     | +     | -     | +     | -   | -   |
| U-638     | G9  | EF           | +     | -     | +     | +     | -     | -     | +     | -   | -   |
| U-1055    | G9  | EF           | +     | -     | +     | +     | -     | +     | +     | -   | -   |
| U-80      | G9  | EF           | +     | -     | -     | -     | -     | -     | -     | -   | -   |
| 4784      | G9  | EF           | +     | -     | +     | +     | +     | +     | +     | -   | -   |
| 491612    | G9  | EF           | +     | -     | -     | +     | -     | +     | +     | -   | -   |
| 491209    | G9  | EF           | +     | -     | +     | +     | -     | +     | +     | -   | -   |
| 4110PR-94 | G9  | EF           | +     | -     | +     | +     | +     | +     | +     | -   | -   |
| 47376     | G10 | EF           | +     | -     | +     | +     | -     | +     | +     | -   | -   |
| 491049    | G11 | EF           | +     | -     | +     | -     | -     | -     | +     | -   | -   |
| 49785     | G12 | EF           | +     | -     | +     | -     | +     | -     | +     | -   | -   |
|           |     | Positive (%) | 81.03 | 3.45  | 67.24 | 39.66 | 13.79 | 37.93 | 87.93 | 0   | 0   |
|           |     | Negative (%) | 18.97 | 96.55 | 32.76 | 60.34 | 86.21 | 62.07 | 12.07 | 100 | 100 |

**Table S2:** Phenotypic antibiotic resistance characterization using a panel Wider I against 20 antibiotics. 1: Penicillin; 2: Ampicillin; 3: Amoxicillin/Clavulanate; 4: Oxacillin; 5: Cefazolin; 6: Cefotaxime; 7: Streptomycin 1000; 8: Gentamicin 500; 9: Amikacin; 10: Vancomycin; 11: Teicoplanin; 12: Levofloxacin; 13: Erythromycin; 14: Clindamycin; 15: Quinupristin/Dalfopristin; 16: Linezolid; 17: Chloramphenicol; 18: Fosfomycin; 19: Trimethoprim/sulfamethoxazole; 20: Rifampicin.

| <i>Enterococcus</i><br>strains | Antibiotic resistance profile Wider I panel |   |   |   |   |   |   |   |   |    |    |    |    |    |    |    |    |    |    |    |
|--------------------------------|---------------------------------------------|---|---|---|---|---|---|---|---|----|----|----|----|----|----|----|----|----|----|----|
|                                | 1                                           | 2 | 3 | 4 | 5 | 6 | 7 | 8 | 9 | 10 | 11 | 12 | 13 | 14 | 15 | 16 | 17 | 18 | 19 | 20 |
| Sb7                            | R                                           | R | R | R | R | R | R | S | R | S  | S  | R  | R  | R  | R  | S  | S  | S  | R  | R  |
| 47391                          | R                                           | R | R | R | R | R | R | S | R | S  | S  | R  | R  | R  | R  | S  | S  | S  | R  | I  |
| 491802                         | R                                           | R | R | R | R | R | S | S | R | S  | S  | R  | R  | R  | S  | S  | S  | S  | R  | S  |
| 49767                          | S                                           | S | S | R | R | R | R | S | R | S  | S  | S  | R  | R  | R  | S  | R  | S  | R  | R  |
| 49867                          | S                                           | S | S | R | R | R | S | S | R | S  | S  | S  | I  | R  | R  | S  | S  | S  | R  | I  |
| 49890                          | S                                           | S | S | R | R | R | S | S | R | S  | S  | S  | R  | R  | R  | S  | S  | S  | R  | I  |
| 491047                         | S                                           | S | S | R | R | R | S | S | R | S  | S  | R  | R  | R  | R  | S  | S  | S  | R  | R  |
| 491698                         | S                                           | S | S | R | R | R | R | S | R | S  | S  | S  | I  | R  | R  | S  | S  | S  | R  | I  |
| U-666                          | S                                           | S | S | R | R | R | S | S | R | S  | S  | S  | S  | R  | R  | S  | S  | S  | R  | S  |
| U-603                          | S                                           | S | S | R | R | R | S | R | R | S  | S  | S  | R  | R  | R  | S  | S  | S  | R  | R  |
| U-1688                         | S                                           | S | S | R | R | R | R | R | R | S  | S  | I  | R  | R  | R  | S  | S  | S  | R  | R  |
| U-230                          | S                                           | S | S | R | R | R | R | S | R | S  | S  | R  | R  | R  | R  | S  | S  | S  | R  | I  |
| 481467                         | S                                           | S | S | R | R | R | S | S | R | S  | S  | S  | R  | R  | R  | S  | S  | S  | R  | I  |
| U-134                          | S                                           | S | S | R | R | R | R | R | R | S  | S  | S  | R  | R  | R  | S  | S  | S  | R  | S  |
| U-1593                         | S                                           | S | S | R | R | R | R | R | R | S  | S  | I  | R  | R  | R  | S  | R  | S  | R  | I  |
| 491051                         | S                                           | S | S | R | R | R | R | S | R | S  | S  | R  | R  | R  | R  | S  | S  | S  | R  | I  |
| 491044                         | S                                           | S | S | R | R | R | S | S | R | S  | S  | R  | S  | R  | R  | S  | S  | R  | R  | I  |
| U-1739                         | S                                           | S | S | R | R | R | S | S | R | S  | S  | S  | S  | R  | R  | S  | S  | S  | R  | R  |
| U-1683                         | S                                           | S | S | R | R | R | R | S | R | S  | S  | S  | R  | R  | R  | S  | R  | S  | R  | I  |
| U-1261                         | S                                           | S | S | R | R | R | S | S | R | S  | I  | S  | R  | R  | R  | S  | S  | S  | R  | R  |
| U-834                          | S                                           | S | S | R | R | R | S | S | R | S  | S  | S  | S  | R  | R  | S  | S  | S  | R  | R  |
| U-1641                         | S                                           | S | S | R | R | R | R | R | R | S  | S  | S  | R  | R  | R  | S  | R  | S  | R  | R  |
| U-1822                         | S                                           | S | S | R | R | R | R | R | R | S  | S  | S  | I  | R  | R  | S  | S  | S  | R  | R  |
| U-1839                         | S                                           | S | S | R | R | R | R | R | S | S  | S  | S  | R  | R  | R  | S  | S  | S  | R  | R  |
| U-814                          | S                                           | S | S | R | R | R | R | R | R | S  | S  | S  | R  | R  | R  | S  | S  | S  | R  | R  |
| U-1564                         | S                                           | S | S | R | R | R | S | S | R | S  | S  | S  | I  | R  | R  | S  | S  | S  | R  | I  |
| 481396                         | S                                           | S | S | R | R | R | S | S | R | S  | S  | S  | R  | R  | R  | S  | S  | S  | R  | S  |
| 4953                           | S                                           | S | S | R | R | R | R | R | R | S  | S  | S  | R  | R  | R  | S  | R  | R  | R  | I  |
| 49768                          | S                                           | S | S | R | R | R | S | S | R | S  | S  | R  | S  | R  | R  | S  | S  | S  | R  | I  |
| 491284                         | S                                           | S | S | R | R | R | R | R | R | S  | S  | R  | R  | R  | R  | S  | S  | S  | R  | I  |
| 49891                          | S                                           | S | S | R | R | R | S | S | R | S  | S  | R  | R  | R  | R  | S  | S  | S  | R  | I  |
| 47374                          | S                                           | S | S | R | R | R | R | S | R | S  | S  | I  | S  | R  | R  | S  | S  | S  | R  | I  |
| 481398                         | S                                           | S | S | R | R | R | S | S | R | S  | S  | S  | I  | R  | R  | S  | S  | S  | R  | I  |
| U-800                          | S                                           | S | S | R | R | R | R | S | R | S  | S  | R  | R  | R  | R  | S  | R  | S  | R  | I  |
| 481609                         | S                                           | S | S | R | R | R | R | S | R | S  | S  | R  | R  | R  | R  | S  | R  | S  | R  | I  |
| 481413                         | S                                           | S | S | R | R | R | S | S | R | S  | S  | S  | R  | R  | R  | S  | R  | S  | R  | I  |

|               |      |      |      |     |     |     |      |      |      |     |      |      |      |     |      |     |      |      |     |      |
|---------------|------|------|------|-----|-----|-----|------|------|------|-----|------|------|------|-----|------|-----|------|------|-----|------|
| 49850         | S    | S    | S    | R   | R   | R   | R    | S    | R    | S   | S    | S    | R    | R   | R    | S   | S    | S    | R   | R    |
| 49454         | S    | S    | S    | R   | R   | R   | R    | S    | R    | S   | S    | S    | R    | R   | R    | S   | S    | S    | R   | I    |
| U-1846        | S    | S    | S    | R   | R   | R   | S    | S    | R    | S   | S    | S    | R    | R   | R    | S   | S    | S    | R   | S    |
| U-1679        | S    | S    | S    | R   | R   | R   | S    | S    | R    | S   | S    | S    | S    | R   | R    | S   | S    | S    | R   | S    |
| 49353         | S    | S    | S    | R   | R   | R   | S    | S    | R    | S   | S    | R    | R    | R   | R    | S   | S    | S    | R   | I    |
| 491440        | S    | S    | S    | R   | R   | R   | S    | S    | R    | S   | S    | S    | I    | R   | R    | S   | S    | S    | R   | I    |
| 491797        | S    | S    | S    | R   | R   | R   | S    | S    | R    | S   | S    | S    | S    | R   | R    | S   | S    | S    | R   | I    |
| 491376        | S    | S    | S    | R   | R   | R   | S    | S    | R    | S   | S    | S    | S    | R   | R    | S   | S    | S    | R   | I    |
| 49324         | S    | S    | S    | R   | R   | R   | S    | S    | R    | S   | S    | S    | I    | R   | R    | S   | S    | S    | R   | I    |
| U-1765        | S    | S    | S    | R   | R   | R   | R    | S    | R    | S   | S    | S    | R    | R   | R    | S   | R    | S    | R   | R    |
| 47342         | S    | S    | S    | R   | R   | R   | R    | S    | R    | S   | S    | S    | R    | R   | R    | S   | S    | S    | R   | R    |
| 491336        | S    | S    | S    | R   | R   | R   | R    | S    | R    | S   | S    | S    | R    | R   | R    | S   | S    | S    | R   | I    |
| U-638         | S    | S    | S    | R   | R   | R   | S    | S    | R    | S   | S    | S    | I    | R   | R    | S   | S    | S    | R   | I    |
| U-1055        | S    | S    | S    | R   | R   | R   | S    | S    | R    | S   | S    | S    | R    | R   | S    | S   | S    | S    | R   | I    |
| U-80          | S    | S    | S    | R   | R   | R   | S    | R    | R    | S   | S    | S    | R    | R   | R    | S   | R    | S    | R   | R    |
| 4784          | S    | S    | S    | R   | R   | R   | R    | S    | R    | S   | S    | S    | R    | R   | R    | S   | R    | S    | R   | I    |
| 491612        | S    | S    | S    | R   | R   | R   | S    | S    | R    | S   | S    | S    | R    | R   | R    | S   | S    | S    | R   | I    |
| 491209        | S    | S    | S    | R   | R   | R   | S    | S    | R    | S   | S    | S    | R    | R   | R    | S   | R    | S    | R   | I    |
| 4110PR-94     | S    | S    | S    | R   | R   | R   | R    | S    | R    | S   | S    | S    | R    | R   | R    | S   | S    | S    | R   | I    |
| 47376         | S    | S    | S    | R   | R   | R   | S    | S    | R    | S   | S    | S    | I    | R   | R    | S   | S    | S    | R   | R    |
| 491049        | S    | S    | S    | R   | R   | R   | S    | S    | R    | S   | S    | S    | I    | R   | R    | S   | S    | S    | R   | I    |
| 49785         | S    | S    | S    | R   | R   | R   | R    | R    | R    | S   | S    | S    | R    | R   | R    | S   | S    | S    | R   | I    |
| Resistant %   | 5.2  | 5.2  | 5.2  | 100 | 100 | 100 | 46.6 | 20.7 | 98.3 | 0   | 0    | 22.4 | 67.2 | 100 | 96.6 | 0   | 20.7 | 3.4  | 100 | 29.3 |
| Sensitive %   | 94.8 | 94.8 | 94.8 | 0   | 0   | 0   | 53.4 | 79.3 | 1.7  | 100 | 98.3 | 72.4 | 15.5 | 0   | 3.4  | 100 | 79.3 | 96.6 | 0   | 10.3 |
| Intermedial % | 0    | 0    | 0    | 0   | 0   | 0   | 0    | 0    | 0    | 0   | 1.7  | 5.2  | 17.2 | 0   | 0    | 0   | 0    | 0    | 0   | 60.3 |

**Table S3:** MIC (mg/L) for AS-48, vancomycin (Van), gentamicin (Gen) and amoxicillin/clavulanate (Amo/Cla).

| <i>Enterococcus</i><br>strains | MIC (mg/ L) |     |      |         |
|--------------------------------|-------------|-----|------|---------|
|                                | AS-48       | Van | Gen  | Amo/Cla |
| Sb7                            | 1.9         | 1.6 | 4    | 10.9    |
| 47391                          | 3.5         | 0.9 | 8    | 10.9    |
| 491802                         | 2.1         | 1.9 | 8    | 136.7   |
| 49767                          | 2.1         | 2.6 | 16   | 1.4     |
| 49867                          | 4.2         | 1.9 | 16   | 0.7     |
| 49890                          | 4.2         | 2.6 | 16   | 0.7     |
| 491047                         | 2.8         | 1.9 | 16   | 0.7     |
| 491698                         | 7.1         | 3.2 | 64   | 0.3     |
| U-666                          | 5.6         | 3.9 | 16   | 1.4     |
| U-603                          | 3.8         | 2.6 | 16   | 0.7     |
| U-1688                         | 3.1         | 1.9 | >128 | 1.4     |
| U-230                          | 2.8         | 3.9 | >128 | 1.4     |
| 481467                         | 2.8         | 7.8 | 16   | 0.3     |
| U-134                          | 3.8         | 1.9 | 16   | 0.7     |
| U-1593                         | 1.9         | 3.9 | >128 | 0.7     |
| 491051                         | 2.8         | 3.2 | 16   | 0.2     |
| 491044                         | 3.5         | 3.9 | 16   | 1.4     |
| U-1739                         | 3.1         | 2.6 | 16   | 0.2     |
| U-1683                         | 2.5         | 3.2 | 32   | 0.2     |
| U-1261                         | 3.5         | 3.2 | 32   | 0.7     |
| U-834                          | 1.9         | 2.6 | 16   | 0.7     |
| U-1641                         | 3.8         | 3.9 | >128 | 0.7     |
| U-1822                         | 2.1         | 1.9 | 16   | 1.4     |
| U-1839                         | 2.5         | 3.2 | 128  | 1.4     |
| U-814                          | 1.9         | 1.9 | >128 | 0.5     |
| U-1564                         | 1.9         | 1.9 | 32   | 0.2     |
| 481396                         | 2.8         | 3.9 | 16   | 0.7     |
| 4953                           | 2.8         | 1.9 | 64   | 1.4     |
| 49768                          | 2.8         | 3.9 | 32   | 1.4     |
| 491284                         | 4.2         | 3.9 | >128 | 1.4     |
| 49891                          | 2.1         | 2.6 | 16   | 0.7     |

|                |       |         |           |          |
|----------------|-------|---------|-----------|----------|
| 47374          | 3.5   | 4.5     | 16        | 0.3      |
| 481398         | 4.2   | 3.2     | 16        | 1.4      |
| U-800          | 1.9   | 2.6     | 16        | 0.7      |
| 481609         | 4.2   | 1.9     | >128      | 0.7      |
| 481413         | 4.2   | 2.6     | 4         | 1.4      |
| 49850          | 4.2   | 3.2     | 16        | 1.4      |
| 49454          | 2.1   | 1.9     | 16        | 1.4      |
| U-1846         | 1.3   | 2.6     | >128      | 0.2      |
| U-1679         | 3.5   | 3.9     | 16        | 1.4      |
| 49353          | 2.1   | 1.9     | 16        | 0.06     |
| 491440         | 3.5   | 3.9     | 16        | 0.2      |
| 491797         | 2.1   | 3.9     | 16        | 0.2      |
| 491376         | 2.1   | 3.9     | 16        | 0.3      |
| 49324          | 2.8   | 3.9     | 16        | 1.4      |
| U-1765         | 2.5   | 2.6     | 8         | 0.7      |
| 47342          | 4.2   | 2.9     | 16        | 1.4      |
| 491336         | 3.5   | 1.9     | 2         | 0.3      |
| U-638          | 3.6   | 1.9     | 8         | 0.2      |
| U-1055         | 3.8   | 2.6     | 8         | 0.3      |
| U-80           | 3.8   | 1.9     | 16        | 1.4      |
| 4784           | 3.5   | 3.9     | 32        | 0.7      |
| 491612         | 3.5   | 1.9     | 32        | 1.4      |
| 491209         | 2.1   | 3.9     | 16        | 1.4      |
| 4110PR-94      | 2.1   | 3.9     | 16        | 0.7      |
| 47376          | 3.5   | 1.3     | 16        | 0.06     |
| 491049         | 2.8   | 1.9     | 16        | 0.7      |
| 49785          | 4.2   | 2.6     | >128      | 1.4      |
| Average±stdeva | 3.1±1 | 2.9±1.1 | 37.3±43.2 | 3.5±17.9 |

**Table S4:** Primers and PCR conditions used in this work.

| Primer     | Sequence 5'-3'         | Purpose                               | PCR conditions                                                                       | Reference |
|------------|------------------------|---------------------------------------|--------------------------------------------------------------------------------------|-----------|
| M13        | gagggtggcggttct        | RAPD                                  | 1 × 94 °C 1 m,<br>35 × (94 °C 1 m,<br>40 °C 20 s, 72 °C<br>1:20 m) 1 × 72 °C<br>5 m. | [1]       |
| Entero 1   | cccggctcaaccggg        | <i>Enterococcus</i> 16S<br>rDNA       | 1 × 94 °C 1 m,<br>30 × (94 °C 1 m,<br>60 °C 1 m, 72 °C<br>1 m) 1 × 72 °C<br>5 m.     | [2]       |
| Entero 2   | ctctagagtggtaaa        |                                       |                                                                                      |           |
| FAC1-1     | gagtaaatcactgaacga     | <i>E. faecium</i> <i>ddl</i><br>gene  | 1 × 94 °C 3 m,<br>30 × (94 °C 1 m,<br>54 °C 1 m, 72 °C<br>1 m) 1 × 72 °C<br>7 m.     | [3]       |
| FAC2-1     | cgctgatggtatcgattcat   |                                       |                                                                                      |           |
| ddl-E1     | atcaagtacagttagtctt    | <i>E. faecalis</i> <i>ddl</i><br>gene | 1 × 94 °C 3 m,<br>30 × (94 °C 1 m,<br>54 °C 1 m, 72 °C<br>1 m) 1 × 72 °C<br>7 m.     | [4]       |
| ddl-E2     | acgattcaaagctaactg     |                                       |                                                                                      |           |
| Van-Af     | tctgcaatagagatagccgc   | <i>vanA</i>                           | 1 × 94 °C 3 m,<br>30 × (94 °C 1 m,<br>55 °C 1 m, 72 °C<br>1 m) 1 × 72 °C<br>5 m.     | [5]       |
| Van-Ar     | ggagtagctatcccagcatt   |                                       |                                                                                      |           |
| Van-Bf     | gctccgcagcctgcatggaca  | <i>vanB</i>                           | 1 × 94 °C 3 m,<br>30 × (94 °C 1 m,<br>55 °C 1 m, 72 °C<br>1 m) 1 × 72 °C<br>5 m.     | [6]       |
| Van-Br     | acgatgccgccaatcctcctgc |                                       |                                                                                      |           |
| CYT I      | actcggggattgataggc     | <i>cylA</i>                           | 1 × 94 °C 3 m,<br>30 × (94 °C 1 m,<br>55 °C 1 m, 72 °C<br>1 m) 1 × 72 °C<br>5 m.     | [6]       |
| CYT IIb    | gctgctaaagctgcgctt     |                                       |                                                                                      |           |
| Gel11_for  | tatgacaatgctttttgggat  | <i>gelE</i>                           | 1 × 94 °C 3 m,<br>30 × (94 °C 1 m,<br>55 °C 1 m, 72 °C<br>1 m) 1 × 72 °C<br>5 m.     | [6]       |
| Gel12_rev  | agatgcacccgaataatata   |                                       |                                                                                      |           |
| ASA11_for  | gcacgctattacgaactatga  | <i>asaI</i>                           | 1 × 94 °C 3 m,<br>30 × (94 °C 1 m,<br>55 °C 1 m, 72 °C<br>1 m) 1 × 72 °C<br>5 m.     | [6]       |
| ASA12_rev  | taagaagaacatcaccacga   |                                       |                                                                                      |           |
| Hyl1_for   | acagaagagctgcaggaaatg  | <i>hyl</i>                            | 1 × 94 °C 3 m,<br>30 × (94 °C 1 m,<br>55 °C 1 m, 72 °C<br>1 m) 1 × 72 °C<br>5 m.     | [6]       |
| Hyl12_rev  | gactgacgtccaagtttccaa  |                                       |                                                                                      |           |
| Esp14F_for | agatttcattttgattcttgg  | <i>esp</i>                            | 1 × 94 °C 3 m,<br>30 × (94 °C 1 m,<br>55 °C 1 m, 72 °C<br>1 m) 1 × 72 °C<br>5 m.     | [6]       |
| Esp12R_rev | aattgattcttttagcatctgg |                                       |                                                                                      |           |
| EFA-AF     | gccaattgggacagaccctc   | <i>efaA</i>                           | 1 × 94 °C 3 m,<br>30 × (94 °C 1 m,<br>55 °C 1 m, 72 °C<br>1 m) 1 × 72 °C<br>5 m.     | [7,8]     |
| EFA-AR     | cgcttctgttcttctttggc   |                                       |                                                                                      |           |
| ACE-F      | gaattgagcaaaagttcaatcg | <i>ace</i>                            | 1 × 94 °C 3 m,<br>30 × (94 °C 1 m,<br>55 °C 1 m, 72 °C<br>1 m) 1 × 72 °C<br>5 m.     | [7,8]     |
| ACE-R      | gtctgtctttcactgtttc    |                                       |                                                                                      |           |

**References:**

1. Martín-Platero, A.M.; Maqueda, M.; Valdivia, E.; Purswani, J.; Martínez-Bueno, M. Polyphasic study of microbial communities of two Spanish farmhouse goats' milk cheeses from Sierra de Aracena. *Food Microbiol.* **2009**, *26*, 294–304, doi:10.1016/j.fm.2008.12.004.
2. Deasy, B.M.; Rea, M.C.; Fitzgerald, G.F.; Cogan, T.M.; Beresford, T.P. A rapid PCR based method to distinguish between *Lactococcus* and *Enterococcus*. *Syst. Appl. Microbiol.* **2000**, *23*, 510–522, doi:10.1016/S0723-2020(00)80025-9.
3. Depardieu, F.; Perichon, B.; Courvalin, P. Detection of the *van* alphabet and identification of Enterococci and Staphylococci at the species level by multiplex PCR. *J. Clin. Microbiol.* **2004**, *42*, 5857–5860, doi:10.1128/JCM.42.12.5857-5860.2004.

4. Dutka-Malen, S.; Evers, S.; Courvalin, P. Detection of glycopeptide resistance genotypes and identification to the species level of clinically relevant enterococci by PCR. *J. Clin. Microbiol.* **1995**, *33*, 1434.
5. Lemcke, R.; Bülte, M. Occurrence of the vancomycin-resistant genes *vanA*, *vanB*, *vanC1*, *vanC2* and *vanC3* in *Enterococcus* strains isolated from poultry and pork. *Int. J. Food Microbiol.* **2000**, *60*, 185–194, doi:10.1016/S0168-1605(00)00310-X.
6. Vankerckhoven, V.; Van Autgaerden, T.; Vael, C.; Lammens, C.; Chapelle, S.; Rossi, R.; Jabes, D.; Goossens, H. Development of a multiplex PCR for the detection of *asa1*, *gelE*, *cylA*, *esp*, and *hyl* genes in enterococci and survey for virulence determinants among European hospital isolates of *Enterococcus faecium*. *J. Clin. Microbiol.* **2004**, *42*, 4473–4479, doi:10.1128/JCM.42.10.4473-4479.2004.
7. Ben Omar, N.; Castro, A.; Lucas, R.; Abriouel, H.; Yousif, N.M.K.; Franz, C.M.A.P.; Holzapfel, W.H.; Pérez-Pulido, R.; Martínez-Cañamero, M.; Gálvez, A. Functional and safety aspects of Enterococci isolated from different Spanish foods. *Syst. Appl. Microbiol.* **2004**, *27*, 118–130, doi:10.1078/0723-2020-00248.
8. Creti, R.; Imperi, M.; Bertuccini, L.; Fabretti, F.; Orefici, G.; Di Rosa, R.; Baldassarri, L. Survey for virulence determinants among *Enterococcus faecalis* isolated from different sources. *J. Med. Microbiol.* **2004**, *53*, 13–20, doi:10.1099/jmm.0.05353-0.
